# Supplementary material
Source: publisher figshare collection journal article supplement (https://geolsoc.figshare.com/ndownloader/files/12948353)
Supplement: Supplementary file 1 [file 12948353]

| Sample  | Lon. (°) | Lat (°) | Elev. (m) | Lithology | Geological constraints on the denudation/burial history                                                                                                                                                                                                                                                                                                                                                                                                                                                                                                                                                                                                                                                                                                                                                                                      |
|---------|----------|---------|-----------|-----------|----------------------------------------------------------------------------------------------------------------------------------------------------------------------------------------------------------------------------------------------------------------------------------------------------------------------------------------------------------------------------------------------------------------------------------------------------------------------------------------------------------------------------------------------------------------------------------------------------------------------------------------------------------------------------------------------------------------------------------------------------------------------------------------------------------------------------------------------|
| BN14-01 | 2.09     | 7.40    | 160       | Granitiod | 1 – Structurally and topographically underneath the Coastal basin. The sample was therefore exposed near sea-level during the Maastrichtian (70 – 65 Ma; the age of the shallow marine sediments in the coastal basin) and buried after that.<br>2 – Sample was collected from an extensive, slightly dissected middle glacia relict landscape and has therefore undergone negligible denudation since 6 Ma.                                                                                                                                                                                                                                                                                                                                                                                                                                 |
| BN14-02 | 2.19     | 7.62    | 144       | Gniess    | 2 – Sample was collected from an extensive, slightly dissected middle glacia relict landscape and has therefore undergone negligible denudation since 6 Ma.<br>2 – Sample is located in an inselberg country culminating at 400 m and has therefore undergone a minimum of 250 m of denudation between 45 and 6 Ma.                                                                                                                                                                                                                                                                                                                                                                                                                                                                                                                          |
| BN14-03 | 2.50     | 8.05    | 197       | Granitiod | 2 – Sample was collected from an extensive, slightly dissected middle glacia relict landscape and has therefore undergone negligible denudation since 6 Ma.<br>2 – Sample is located in an inselberg country culminating at 400 m and has therefore undergone a minimum of 250 m of denudation between 45 and 6 Ma.                                                                                                                                                                                                                                                                                                                                                                                                                                                                                                                          |
| BN14-04 | 2.61     | 8.75    | 302       | Granitoid | 2 – Sample was collected from an extensive, slightly dissected middle glacia relict landscape and has therefore undergone negligible denudation since 6 Ma.                                                                                                                                                                                                                                                                                                                                                                                                                                                                                                                                                                                                                                                                                  |
| BN14-05 | 2.55     | 9.19    | 374       | Granitiod | 2 – Sample was collected from an extensive, slightly dissected middle glacia relict landscape and has therefore undergone negligible denudation since 6 Ma.                                                                                                                                                                                                                                                                                                                                                                                                                                                                                                                                                                                                                                                                                  |
| BN14-06 | 3.19     | 11.68   | 238       | Sandstone | 1 – The sample belongs to a fluvial/coastal formation of Ordovician – Silurian age (Kandi Formation) and was therefore exposed and near sea level sometime between ca. 490 and 420 Ma and could have been subsequently buried.<br>1 – Sample is in the close vicinity (30 km) of the intracratonic lullelmeden basin and “directly” underlies the Continental Terminal (CT) formation. The sample was therefore exposed 59 Ma ago. There was no significant burial since then given the<br>2 – Sample underlies a relict of the Intermediate ferricrete and has therefore undergone no denudation since 29 Ma.<br>3 – Sample is located at the western margin of the Kandi basin, exposing a very thin (<100 m) Lower Cretaceous continental formation. The sample was therefore exposed at the surface sometime between ca. 140 and 100 Ma. |
| BN14-07 | 2.90     | 11.14   | 298       | Gniess    | 2 – Sample was collected from an extensive, slightly dissected middle glacia relict landscape and has therefore undergone negligible denudation since 6 Ma.<br>3 – Sample is located at the western margin of the Kandi basin, exposing a very thin (<100 m) Lower Cretaceous continental formation. The sample was therefore exposed at the surface sometime between ca. 140 and 100 Ma.                                                                                                                                                                                                                                                                                                                                                                                                                                                    |
| BN14-08 | 2.81     | 10.80   | 347       | Sandstone | 1 – The sample belongs to a fluvial/coastal formation of Ordovician – Silurian age (Kandi Formation) and was therefore exposed and near sea level sometime between<br>2 – Sample was collected from an extensive, slightly dissected middle glacia relict landscape and has therefore undergone negligible denudation since 6 Ma.<br>3 – Sample is located at the western margin of the Kandi basin, exposing a very thin (<100 m) Lower Cretaceous continental formation. The sample was therefore exposed at the surface sometime between ca. 140 and 100 Ma.                                                                                                                                                                                                                                                                              |
| BN14-09 | 2.73     | 10.56   | 351       | Gniess    | 2 – Sample was collected from an extensive, slightly dissected middle glacia relict landscape and has therefore undergone negligible denudation since 6 Ma.<br>3 – Sample is located at the western margin of the Kandi basin, exposing a very thin (<100 m) Lower Cretaceous continental formation. The sample was therefore exposed at the surface sometime between ca. 140 and 100 Ma.                                                                                                                                                                                                                                                                                                                                                                                                                                                    |
| BN14-10 | 2.72     | 10.37   | 345       | Gniess    | 2 – Sample was collected from an extensive, slightly dissected middle glacia relict landscape and has therefore undergone negligible denudation since 6 Ma.                                                                                                                                                                                                                                                                                                                                                                                                                                                                                                                                                                                                                                                                                  |
| BN14-11 | 2.60     | 9.77    | 346       | Granitoid | 2 – Sample was collected from an extensive, slightly dissected middle glacia relict landscape and has therefore undergone negligible denudation since 6 Ma.                                                                                                                                                                                                                                                                                                                                                                                                                                                                                                                                                                                                                                                                                  |
| BN14-12 | 2.30     | 9.77    | 338       | Migmatite | 2 – Sample was collected from an extensive, slightly dissected middle glacia relict landscape and has therefore undergone negligible denudation since 6 Ma.                                                                                                                                                                                                                                                                                                                                                                                                                                                                                                                                                                                                                                                                                  |
| BN14-13 | 1.51     | 10.01   | 397       | Granitiod | 2 – Sample was collected from an extensive, slightly dissected middle glacia relict landscape and has therefore undergone negligible denudation since 6 Ma.                                                                                                                                                                                                                                                                                                                                                                                                                                                                                                                                                                                                                                                                                  |
| BN14-14 | 1.19     | 10.76   | 247       | Sandstone | 2 – Sample is from the lower slope of an inselberg on a middle-lower glacia pediplain and has therefore experienced negligible denudation since 6 Ma.                                                                                                                                                                                                                                                                                                                                                                                                                                                                                                                                                                                                                                                                                        |
| BN14-15 | 1.28     | 10.61   | 268       | Sandstone | 2 – Sample taken from the western exit of a gorge carved in the Atacora range (530 m elevation). Since the “top” of the range is a plateau relict of the “African (bauxitic) surface”, the sample has undergone a minimum of 330 m of (local) denudation since 45 Ma.                                                                                                                                                                                                                                                                                                                                                                                                                                                                                                                                                                        |
| BN14-16 | 1.32     | 10.56   | 557       | Sandstone | 2 – Sampled from the “African (bauxitic) surface” and has therefore experienced negligible to no denudation since 45 Ma.                                                                                                                                                                                                                                                                                                                                                                                                                                                                                                                                                                                                                                                                                                                     |
| BN14-17 | 2.63     | 8.36    | 262       | Gniess    | 2 – Sample was collected from an extensive, slightly dissected middle glacia relict landscape and has therefore undergone negligible denudation since 6 Ma.<br>2 – Sample is located in an inselberg country culminating at 400 m and has therefore undergone a minimum of 250 m of denudation between 45 and 6 Ma.                                                                                                                                                                                                                                                                                                                                                                                                                                                                                                                          |
| BN14-18 | 1.82     | 7.06    | 203       | Sandstone | 1 – The sample is a Maastrichtian sandstone from shallow marine environment and was therefore exposed on the shore sometime between 70 and 75 Ma before being<br>2 – Exposed under the Intermediate ferricrete: no denudation since 29 Ma.                                                                                                                                                                                                                                                                                                                                                                                                                                                                                                                                                                                                   |
